# Supplementary material
Source: Springer Nature journal article supplement (https://www.springermedizin.de/resource/supplementary/12936_2012_2233_MOESM2_ESM.pdf/9542614)

# Adult mosquito surveillance

## Dar es Salaam Sampling sites

- Sampling sites - centroids
- Ward boundaries
- Road
- Railway
- River / large drain
- Pond
- Indian Ocean

### Elevation in m

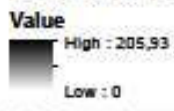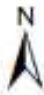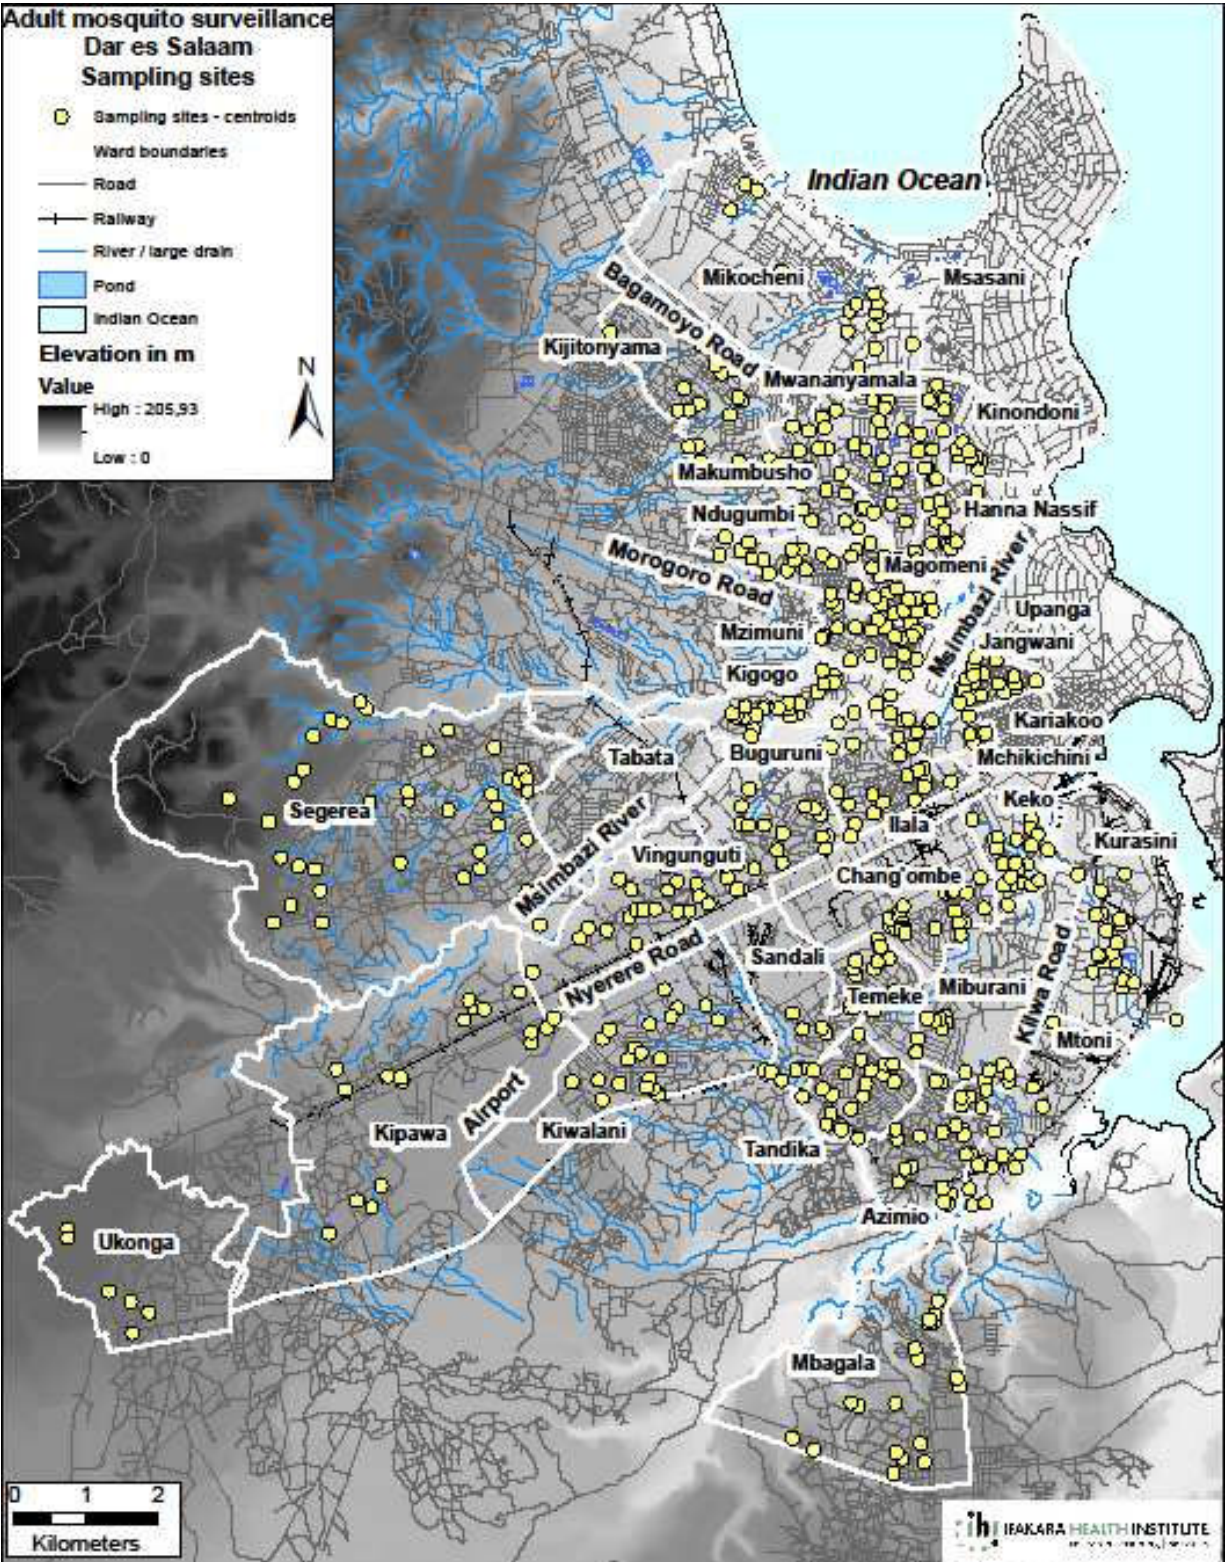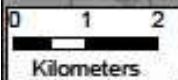

Supplement: MOESM2 [file 9542614]
